# Supplementary material for: Comparative Analysis of the Chemical Composition and Antimicrobial Activity of Four Moroccan North Middle Atlas Medicinal Plants’ Essential Oils: Rosmarinus officinalis L., Mentha pulegium L., Salvia officinalis L., and Thymus zygis subsp. gracilis (Boiss.) R. Morales
Source: MDPI journal article supplement (doi:10.3390/chemistry4040115), 2022-12-19
Supplement: s1 [file s1]

## Comparative Analysis of the Chemical Composition and Antimicrobial Activity of Four Moroccan North Middle

**Atlas Medicinal Plants' Essential Oils: *Rosmarinus officinalis* L., *Mentha pulegium* L., *Salvia officinalis* L., and *Thymus zygis* subsp. *gracilis* (Boiss.) R. Morales**

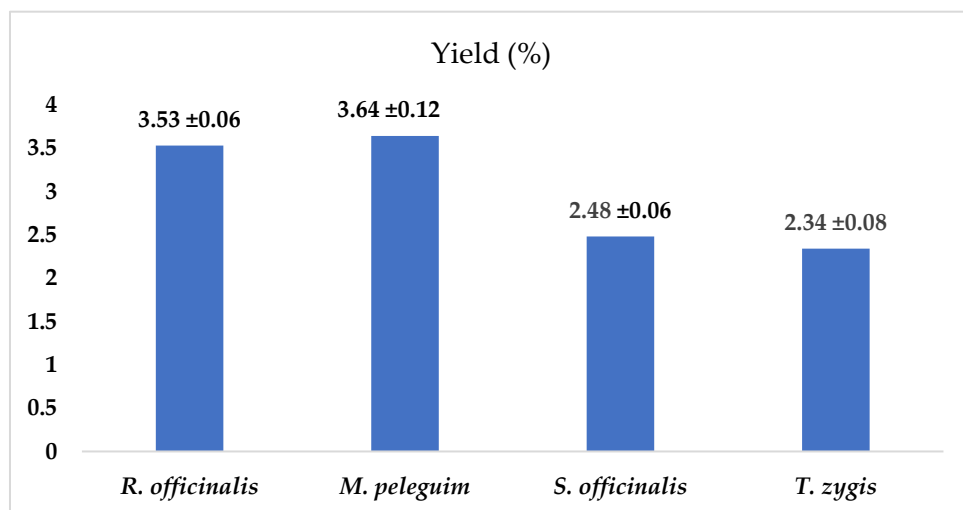

**Figure S1.** Yields of essential oils plants.

(A)

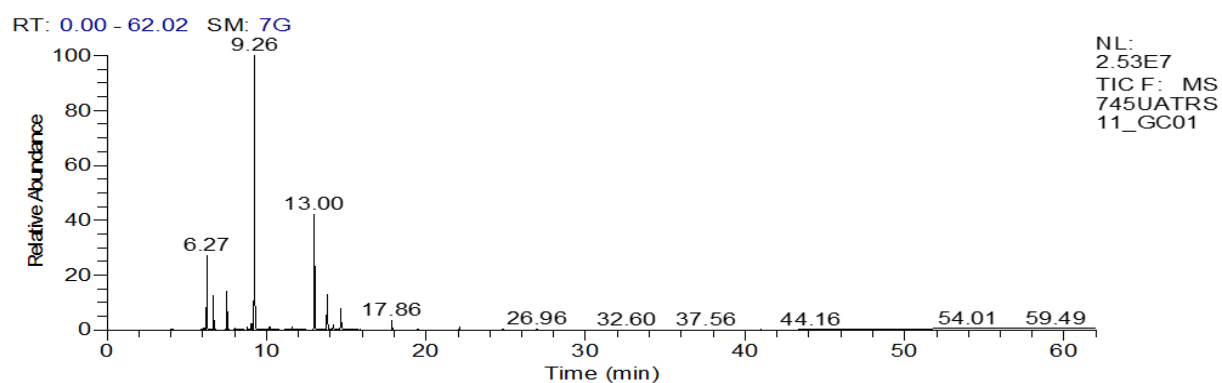

(B)

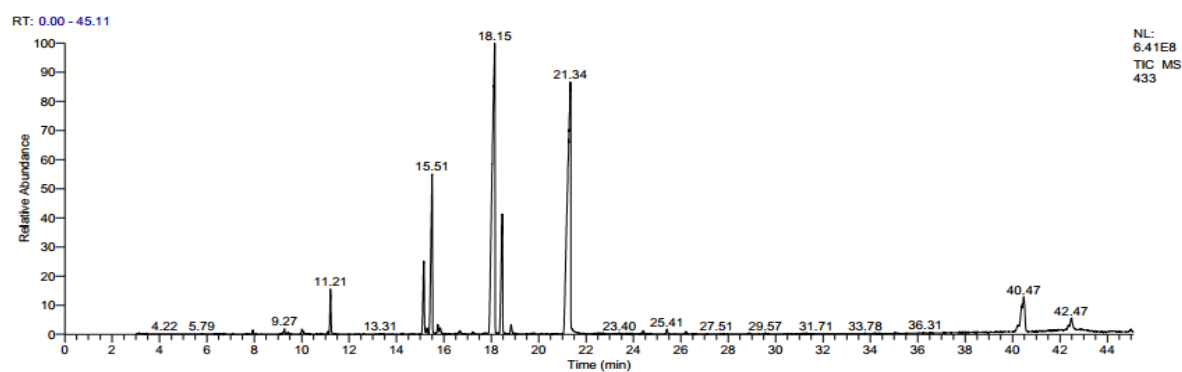

(C)

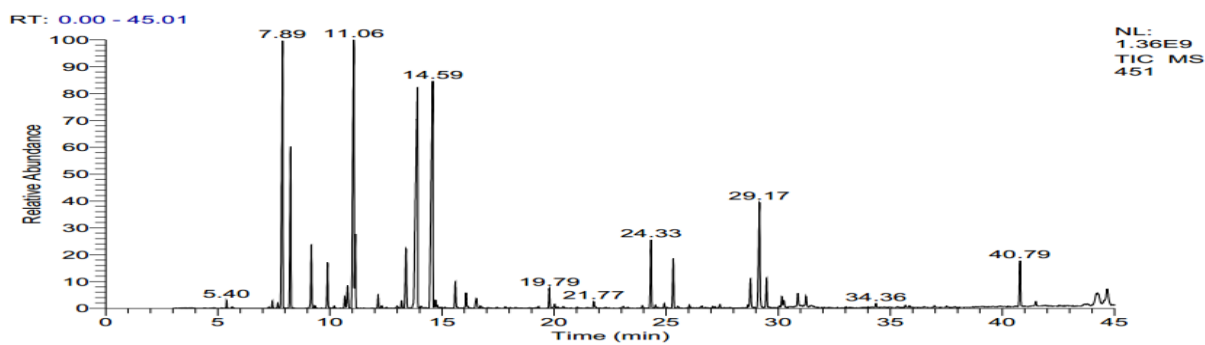

(D)

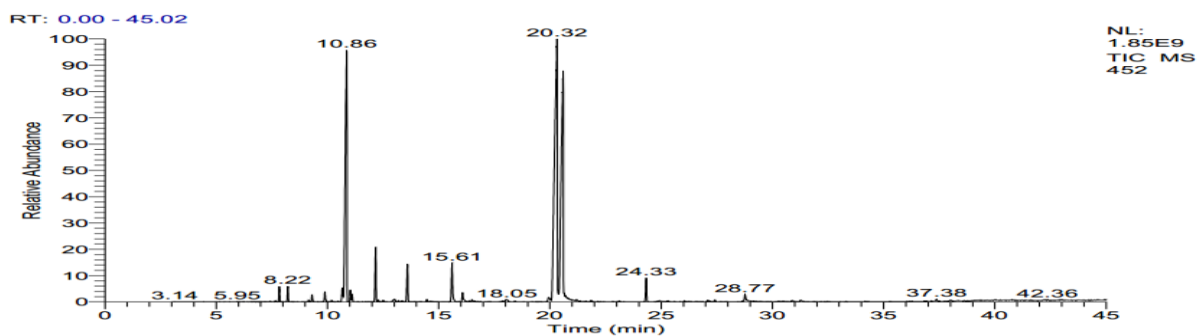

**Figure S2.** GC-MS chromatogram of the EO of *R. officinalis* (A), *M. pulegium* (B), *S. officinalis* (C), and *T. zygis* (D).

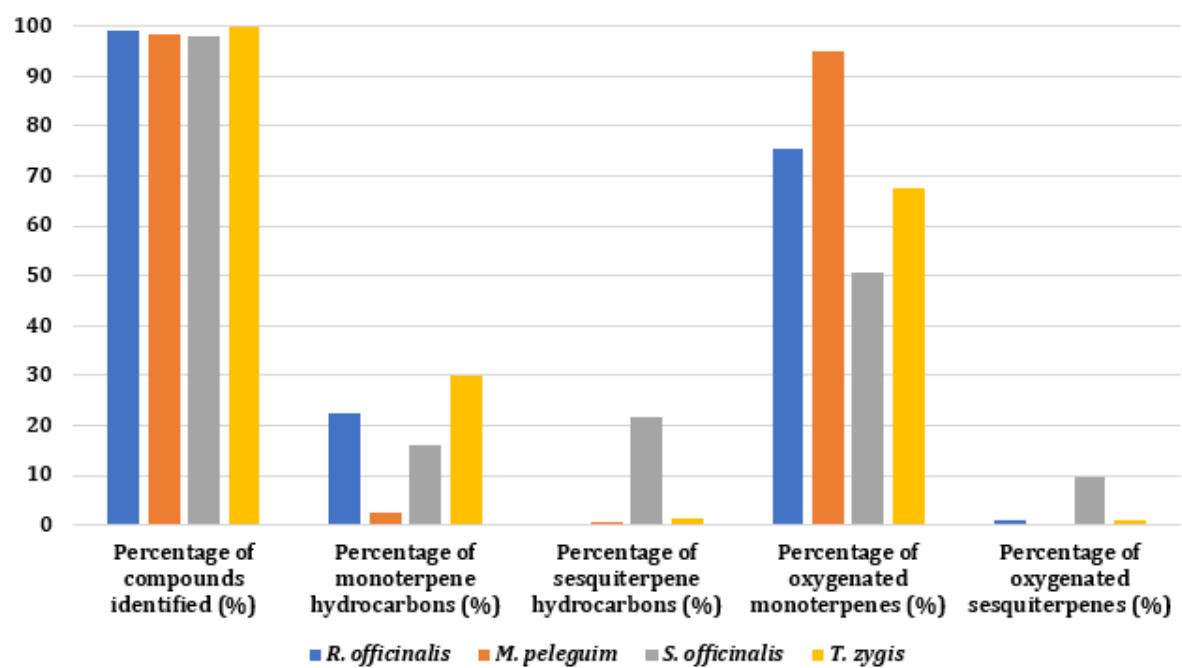

**Figure S3.** Chemical families of the four plants' EO.

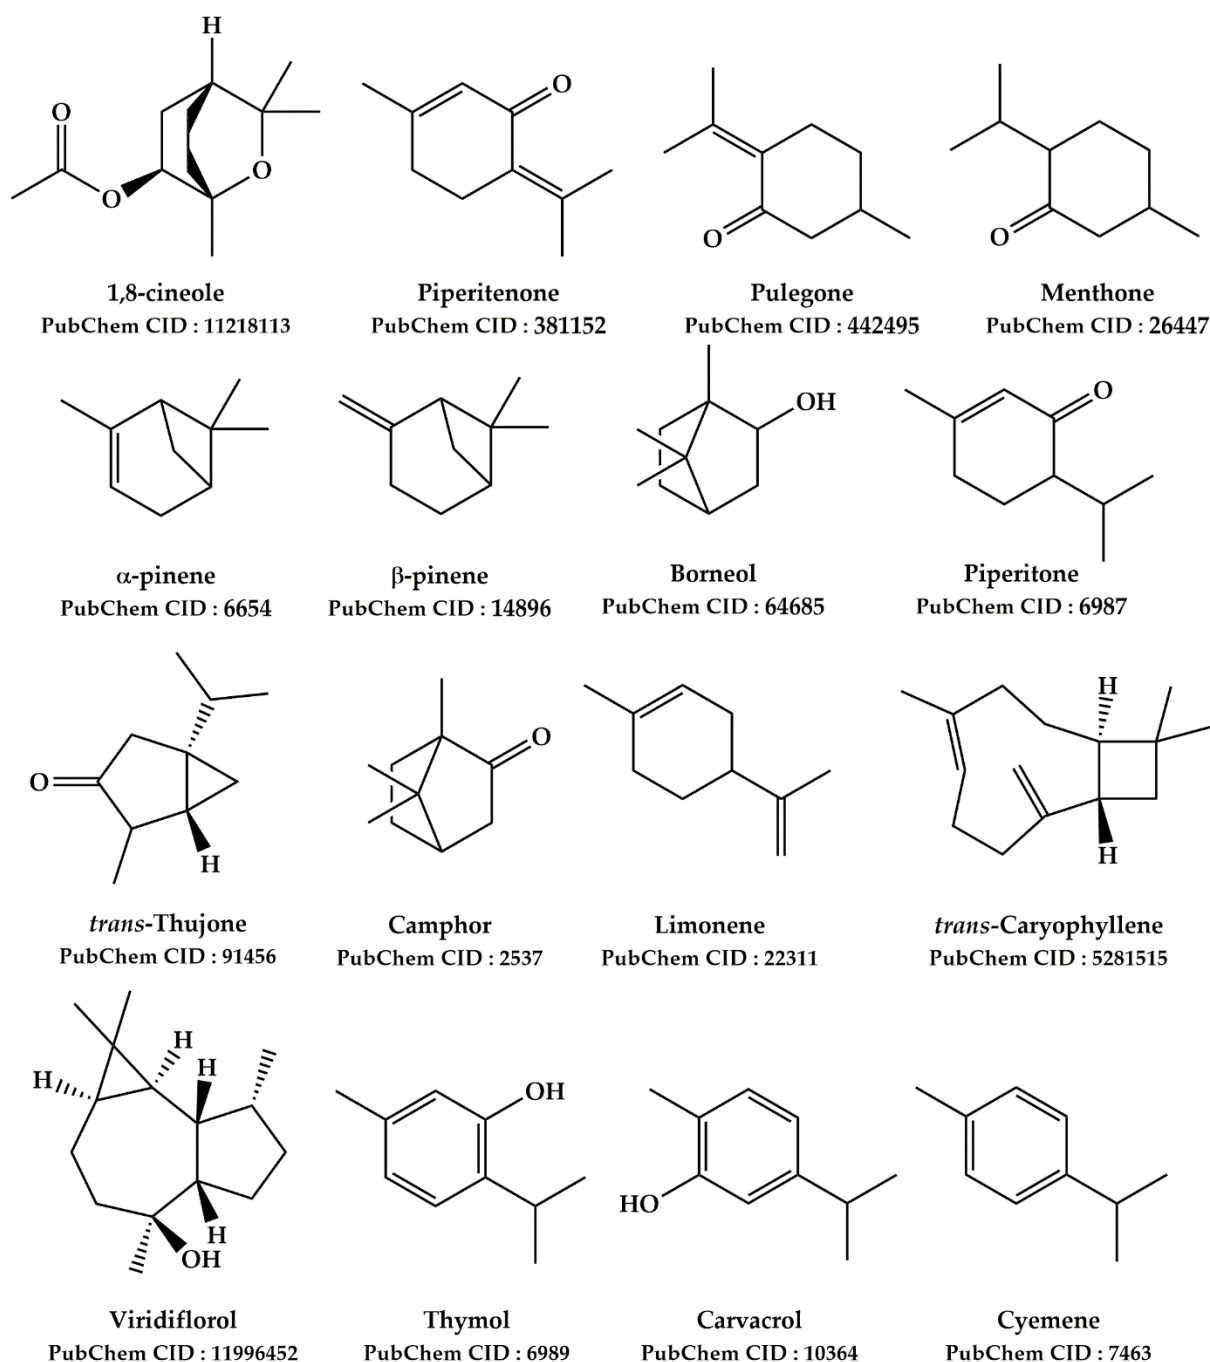

Figure S4. Major chemical compounds isolated from essential oils of *R. officinalis*, *M. pulegium*, *S. officinalis*, and *T. zygis*
